# Supplementary material for: Tumor necrosis factor reduces Plasmodium falciparum growth and activates calcium signaling in human malaria parasites
Source: PubMed Central journal article supplement (PMC4876768; doi:10.1016/j.bbagen.2016.04.003), 2016-07
Supplement: mmc3.pdf [file mmc3.pdf]

## Supplemental data

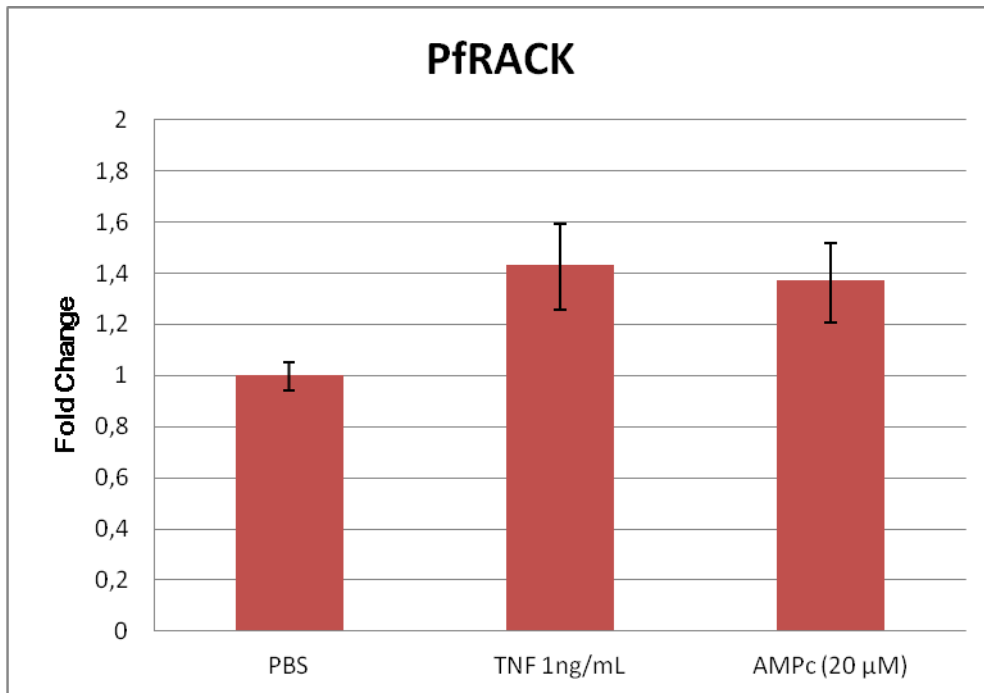

Figure S3
