# Supplementary material for: Tumor necrosis factor reduces Plasmodium falciparum growth and activates calcium signaling in human malaria parasites
Source: PubMed Central journal article supplement (PMC4876768; doi:10.1016/j.bbagen.2016.04.003), 2016-07
Supplement: mmc6.pdf [file mmc6.pdf]

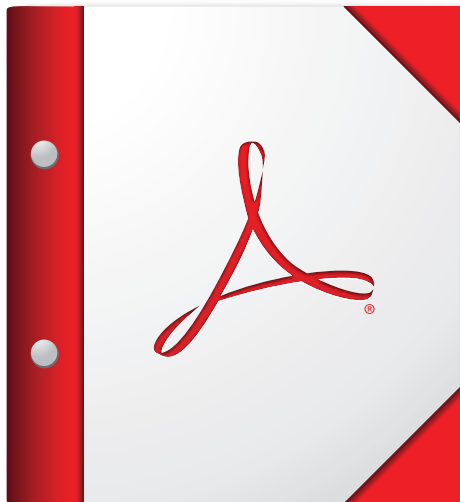

**For the best experience, open this PDF portfolio in  
Acrobat 9 or Adobe Reader 9, or later.**

[Get Adobe Reader Now!](#)
